# Supplementary material
Source: PubMed Central journal article supplement (PMC8462528)
Supplement: NIHMS1686434-supplement-1.pdf [file NIHMS1686434-supplement-1.pdf]

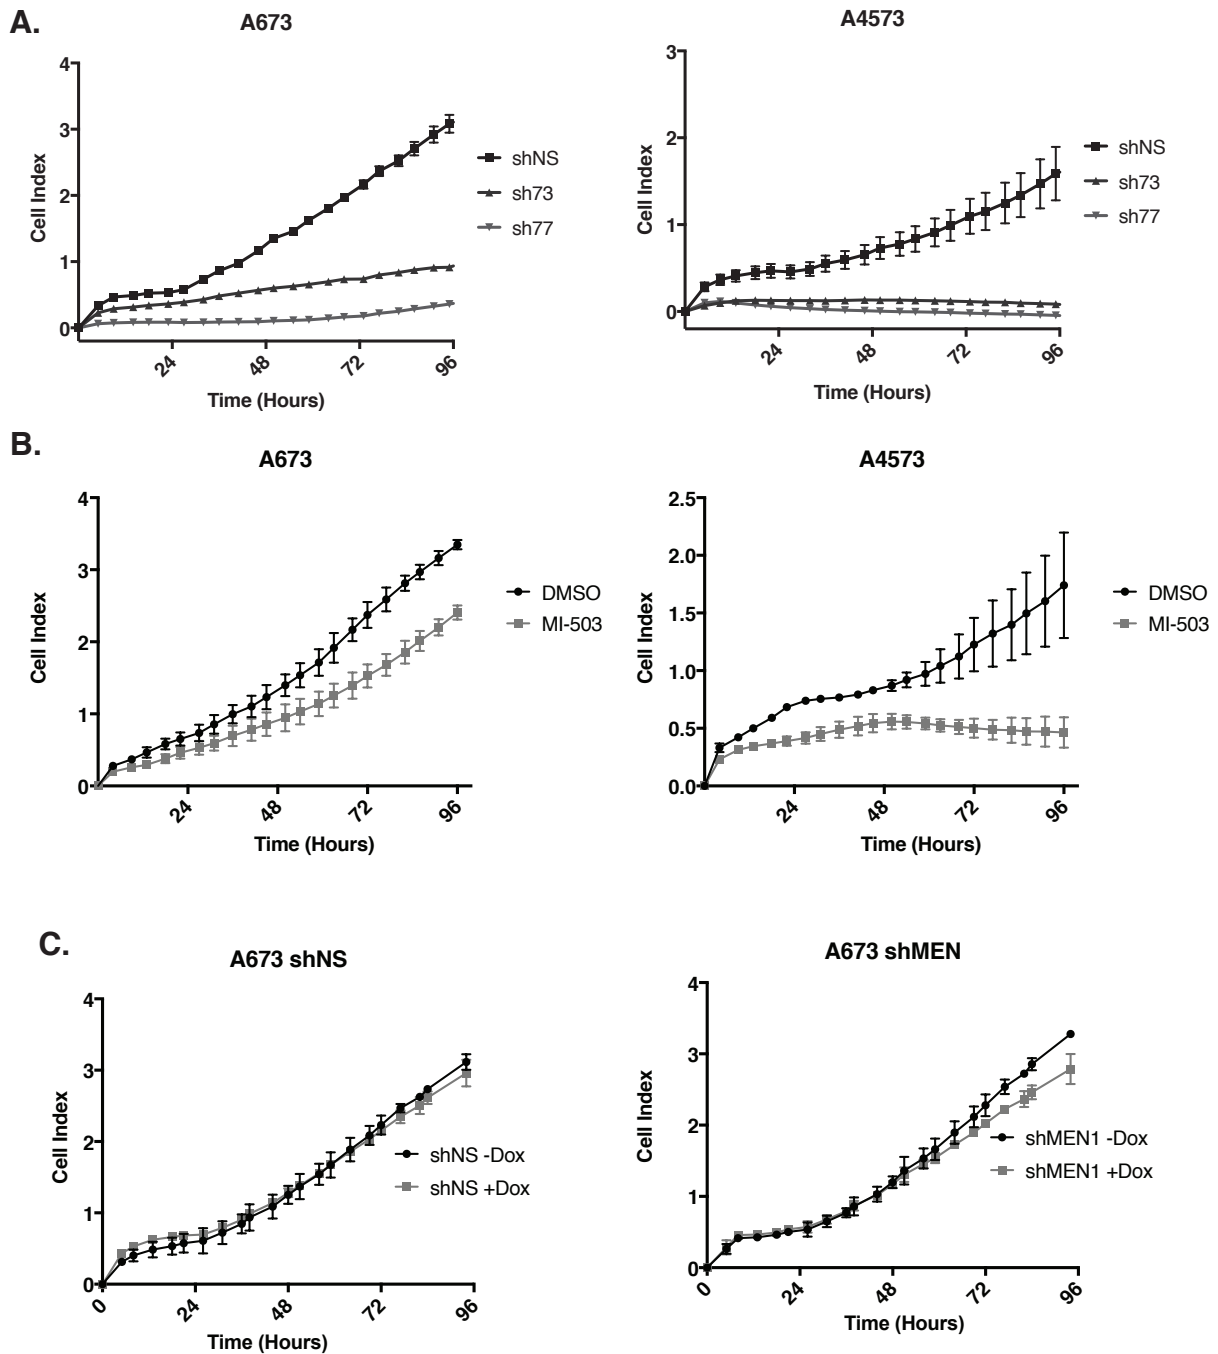

**Supplementary Figure S1. Real-time cell proliferation analysis of shATF4, MI-503 treatment, and dox-inducible shMEN1 knockdown in Ewing sarcoma cells. A,** RTCA xCelligence proliferation assay of A673 and A4573 cells with shNS, or shATF4 (sh73, sh77) knockdown. Data represents the mean of technical quadruplicates. **B,** RTCA xCelligence proliferation assay of 3  $\mu$ M MI-503-treated A673 and A4573 cells (N=2). **C,** RTCA xCelligence proliferation assay of dox-inducible shNS or shMEN1 A673 cells after 72 hours treatment with doxycycline (N=2). Data represent the mean of 2 independent biological replicates.
