# Supplementary material
Source: PubMed Central journal article supplement (PMC8462528)
Supplement: NIHMS1686434-supplement-2.pdf [file NIHMS1686434-supplement-2.pdf]

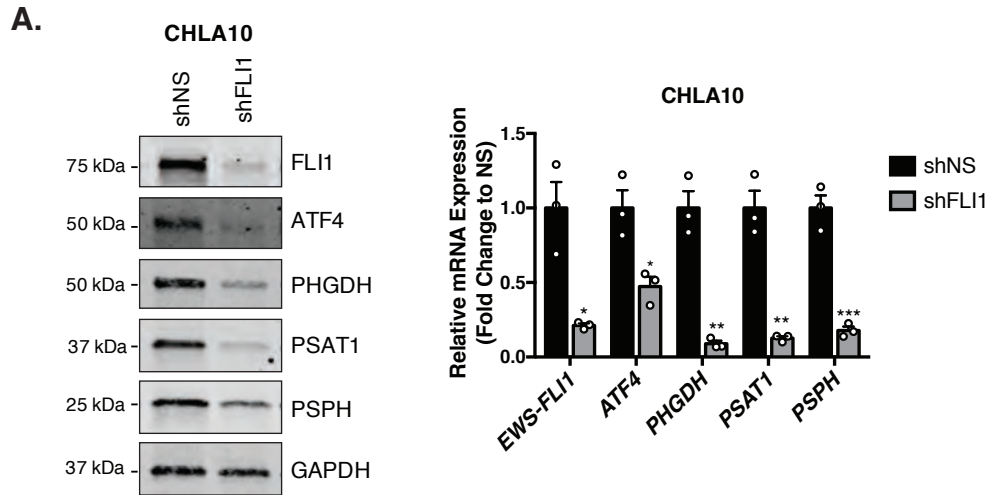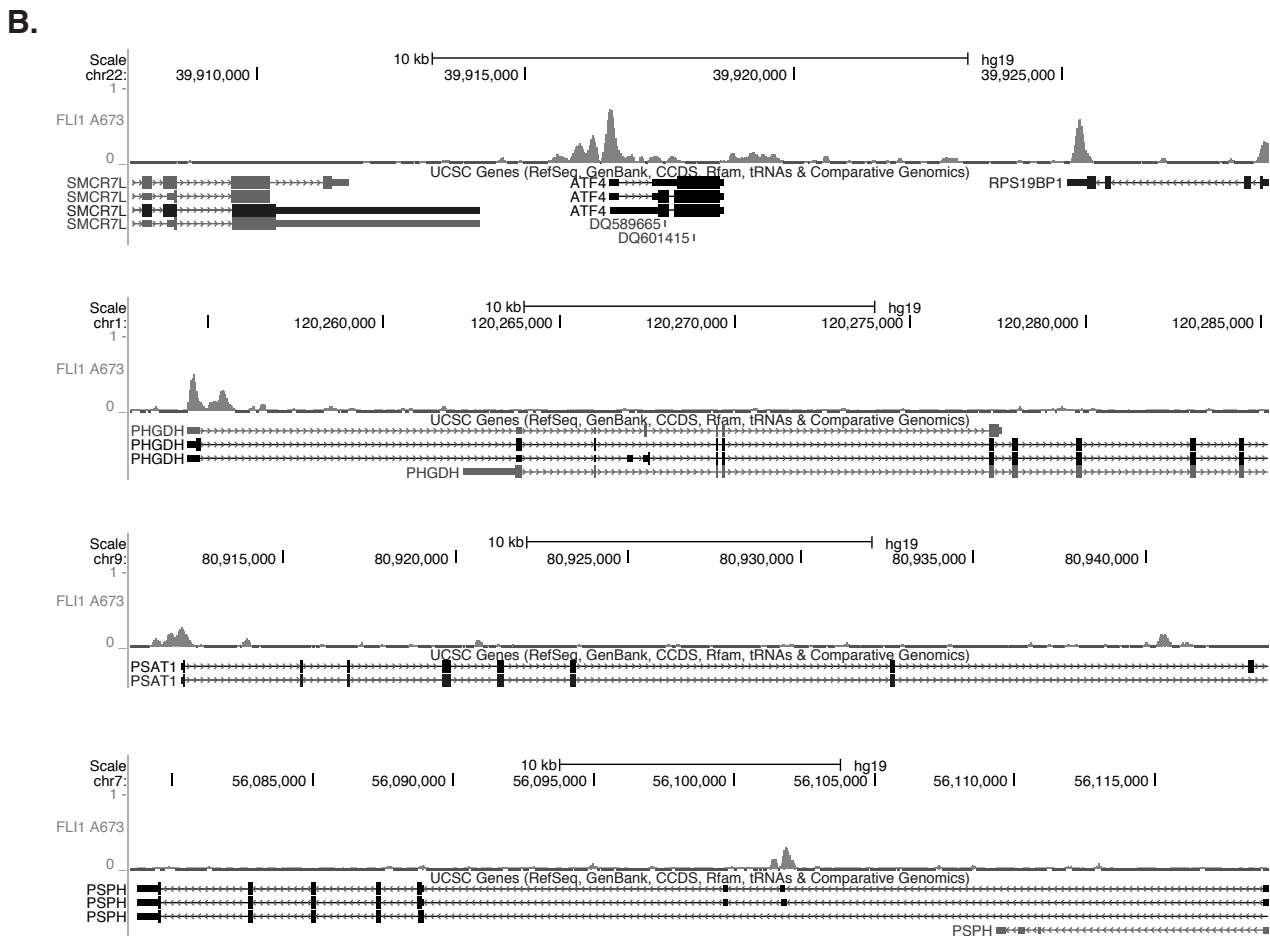

**Supplementary Figure S2. Effect of shFLI1 knockdown in CHLA10 Ewing sarcoma cells and Publicly Available ChIP-seq of EWS-FLI1 at the *ATF4* and *SSP* Gene Promoters.** **A**, Representative western blot (30  $\mu$ g) and qRT-PCR for FLI1 (EWS-FLI1), and SSP (PHGDH, PSAT1, and PSPH) protein and mRNA levels after 96 hours of EWS-FLI1 knockdown (N=3) in CHLA10 cells. **B**, Publicly Available ChIP-seq of EWS-FLI1 at the *ATF4* and SSP Gene Promoters. UCSC Genome Browser image of publicly available ChIP-seq tracks for FLI1 (EWS-FLI1) at the *ATF4*, *PHGDH*, *PSAT1*, and *PSPH* gene promoters in A673 Ewing sarcoma cells [37]. Error bars represent SEM from independent biological replicates. \*  $p < 0.05$ ; \*\*  $p < 0.01$ ; \*\*\*  $p < 0.001$ ; Two-tailed t-test.
